# Supplementary material
Source: PubMed Central journal article supplement (PMC11645558)
Supplement: ajtr0016-7071-f7.pdf [file ajtr0016-7071-f7.pdf]

# MMP9 in cancer & computational screening of inhibitors

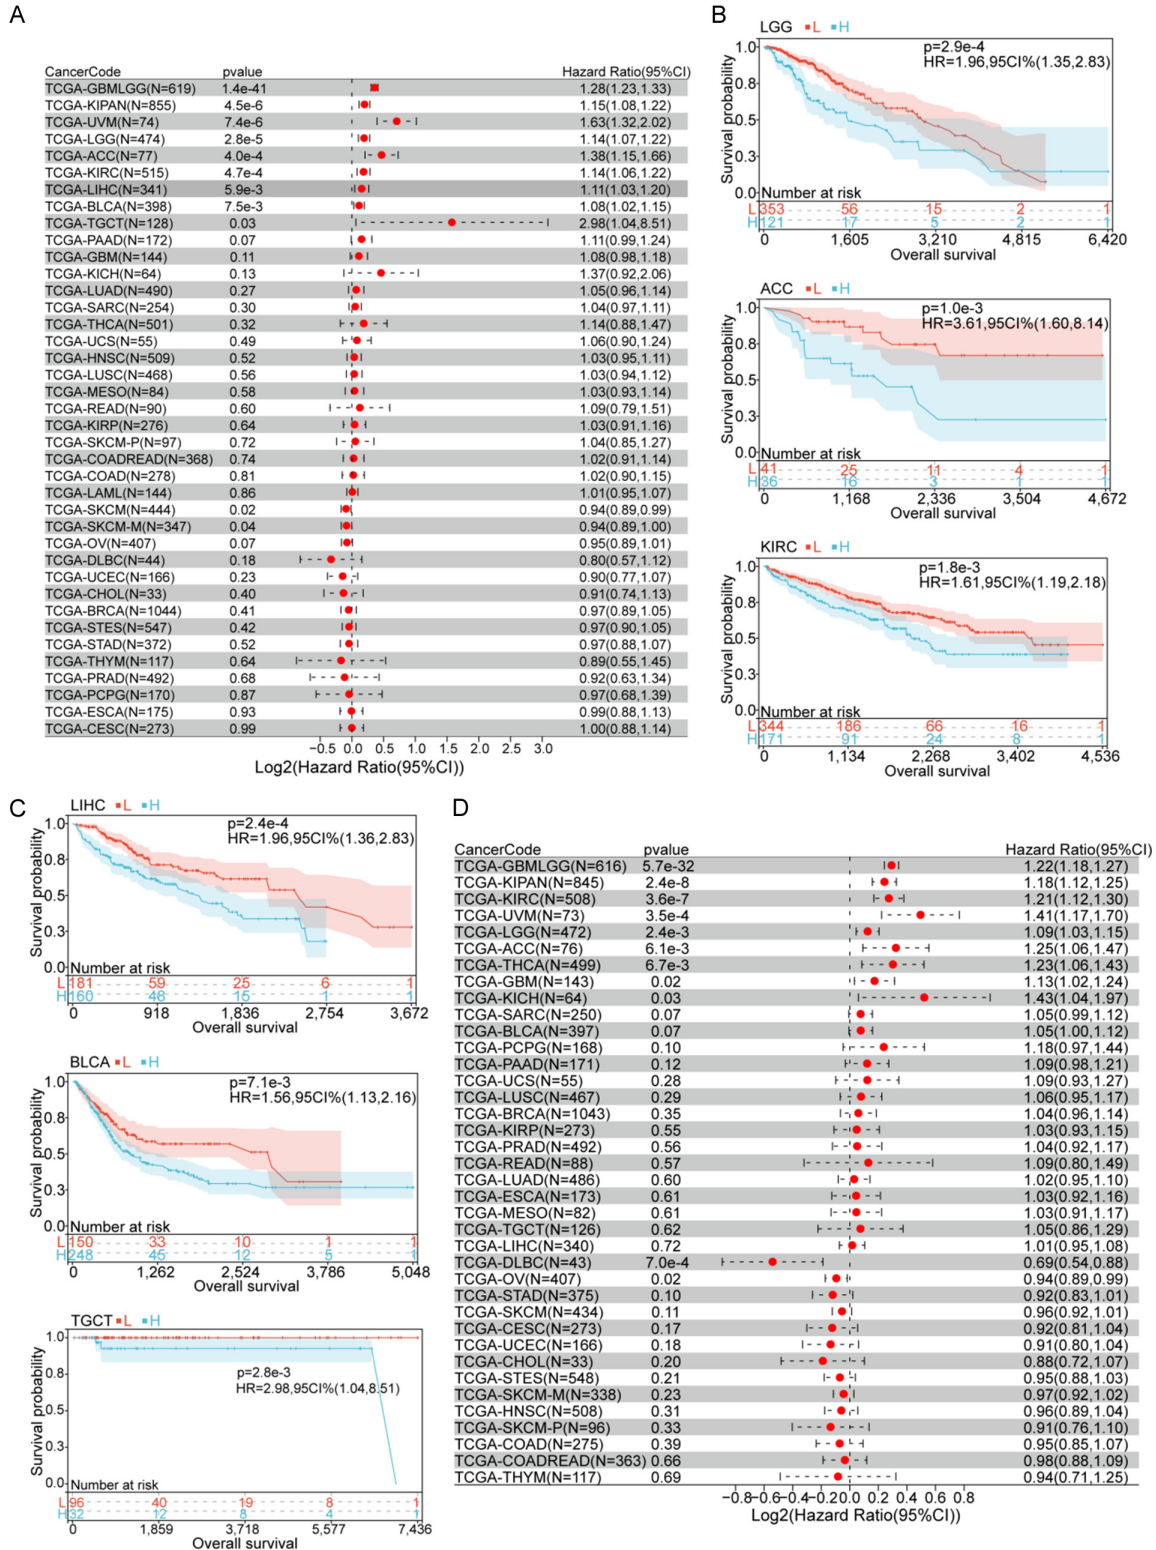

**Supplementary Figure 1.** (A) MMP9 expression correlates with overall survival time (OS). Forest plots showing the correlations between OS and MMP9 expression across 39 types of cancers. (B, C) Survival curves of MMP9 expression in LGG, ACC, KIRC, LIHC, BLCA and TGCT. L represents low expression of MMP9 group, H represents high expression of MMP9 group. (D) Forest plots showing the correlations between Progression-free survival time (PFS) and MMP9 expression across 39 types of cancers.

## MMP9 in cancer & computational screening of inhibitors

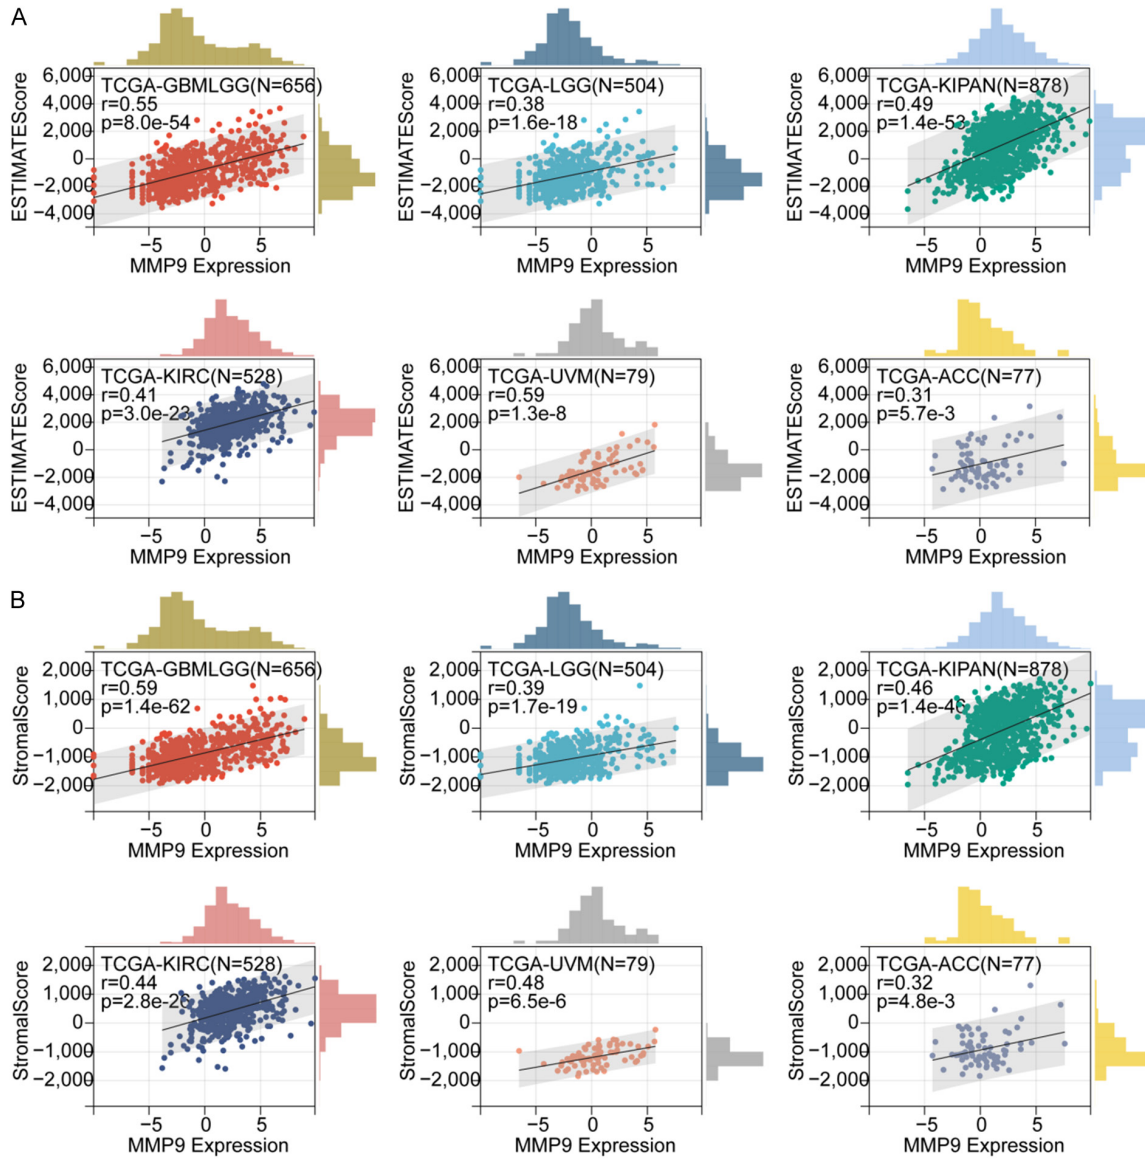

**Supplementary Figure 2.** Pan-cancer cohort (GBMLGG, KICH, KIRC, KIRP, KIPAN and UVM). Correlation between MMP9 expression and pan-cancer (A) estimate score and (B) stroma score.

# MMP9 in cancer & computational screening of inhibitors

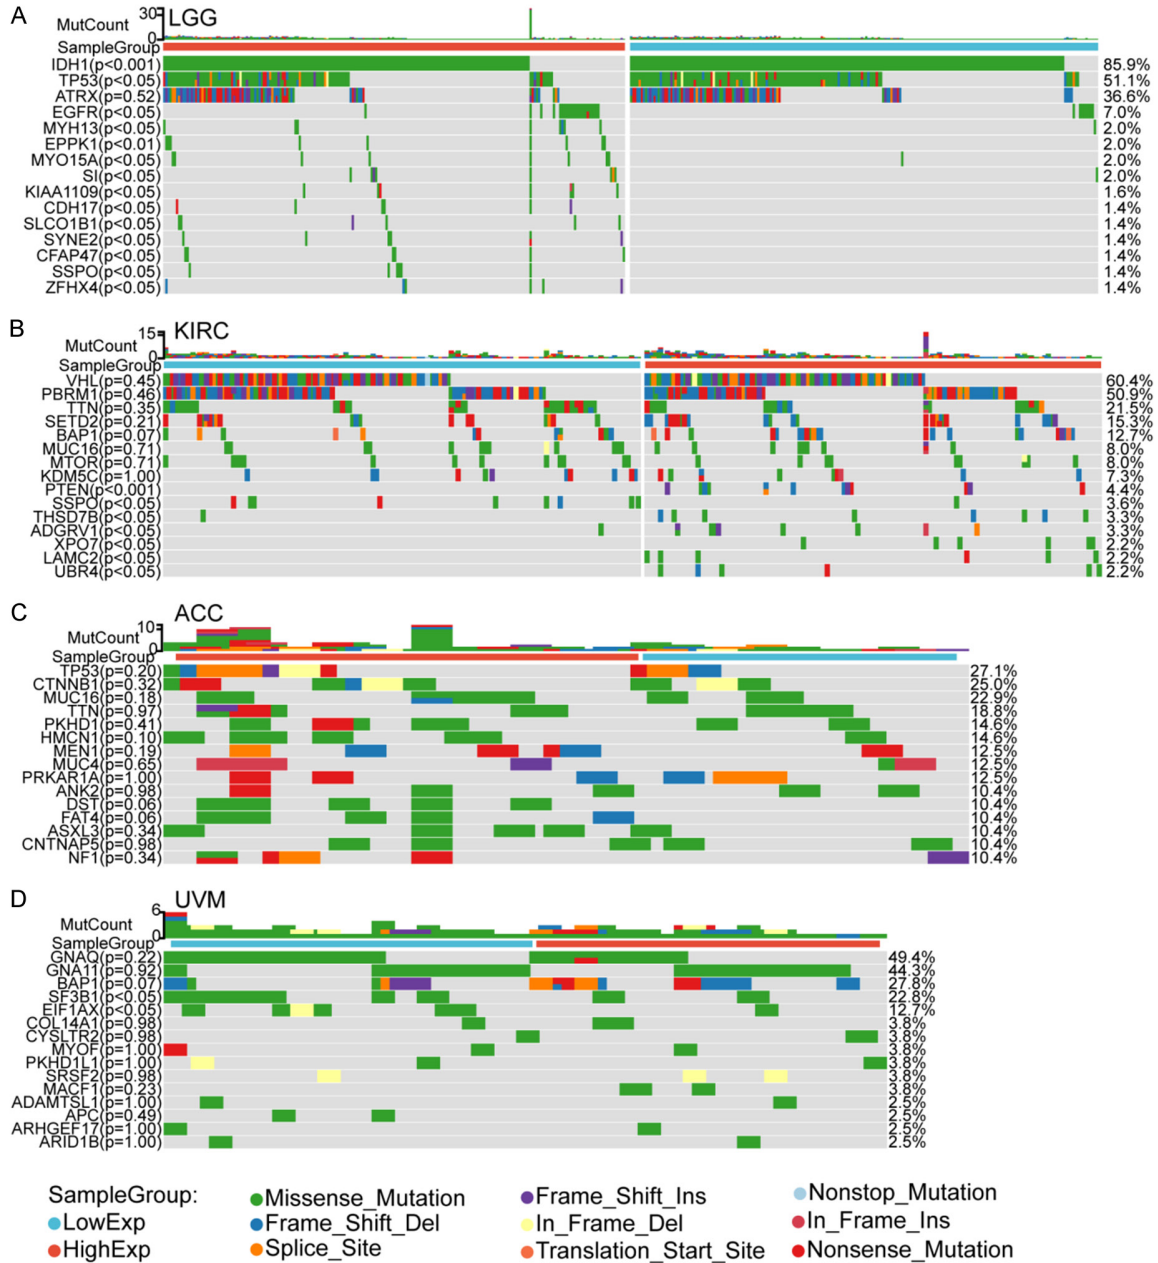

**Supplementary Figure 3.** Correlation between MMP9 expression and tumor mutation burden in (A) LGG, (B) KIRC, (C) ACC and (D) UVM.

# MMP9 in cancer & computational screening of inhibitors

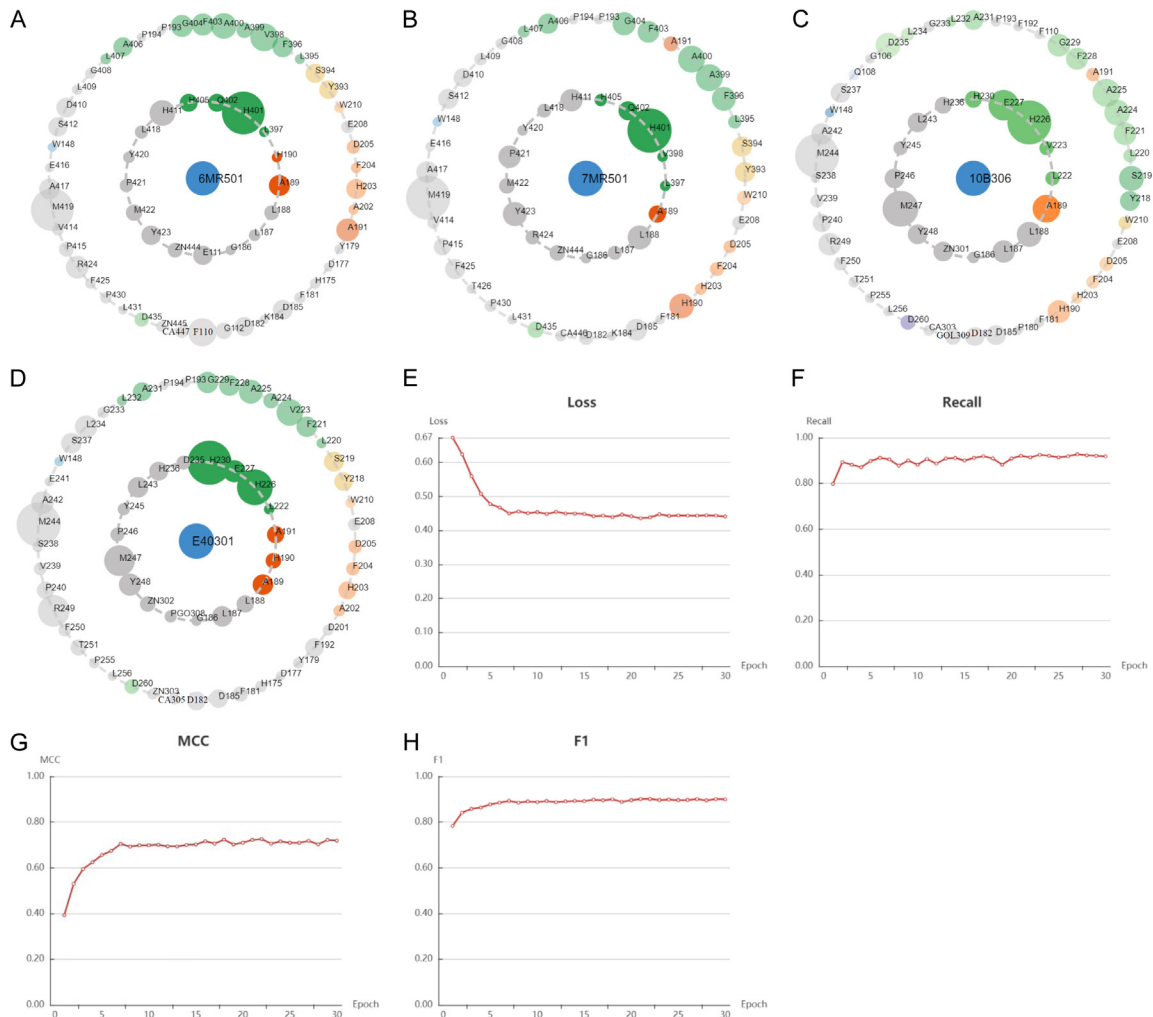

**Supplementary Figure 4.** The interaction between MMP9 and MMP9's inhibitors (A) 20W0 (B) 20W1 (C) 4H3X and (D) 4WZV. (E-H) Evaluation index of deep learning model. Loss, Recall, MCC and F1.

**Supplementary Table 1.** Adsorption, distribution, metabolism, and excretion properties of compounds

|                                | Solubility Level | BBB level | CYP2D6 | Hepatotoxicity | Absorption Level | PPB Level |
|--------------------------------|------------------|-----------|--------|----------------|------------------|-----------|
| CHEMBL344828 PubChem-10764489  | 3                | 3         | 0      | 1              | 0                | 0         |
| CHEMBL2425940 PubChem-73293197 | 3                | 4         | 0      | 1              | 3                | 1         |
| CHEMBL139884 PubChem-10502046  | 3                | 3         | 0      | 1              | 0                | 1         |
| CHEMBL381554 PubChem-44409390  | 3                | 4         | 0      | 1              | 0                | 1         |
| CHEMBL2425944 PubChem-73293200 | 4                | 4         | 0      | 1              | 3                | 0         |
| CHEMBL82047 PubChem-10738924   | 3                | 3         | 0      | 0              | 0                | 1         |
| CHEMBL196647 PubChem-44402021  | 4                | 4         | 0      | 1              | 3                | 1         |
| CHEMBL381163 PubChem-44409365  | 3                | 4         | 0      | 0              | 1                | 1         |
| CHEMBL206481 PubChem-44409389  | 3                | 4         | 0      | 1              | 2                | 0         |
| CHEMBL207776 PubChem-21304710  | 3                | 3         | 0      | 1              | 0                | 1         |
| CHEMBL138643 PubChem-23523890  | 2                | 4         | 0      | 1              | 3                | 1         |
| CHEMBL382227 PubChem-44411830  | 2                | 4         | 0      | 1              | 1                | 1         |
| CHEMBL419503 PubChem-44325156  | 4                | 4         | 0      | 1              | 3                | 0         |
| CHEMBL252711 PubChem-44445823  | 4                | 4         | 0      | 1              | 3                | 0         |
| CHEMBL433171 PubChem-21130561  | 2                | 4         | 0      | 0              | 0                | 1         |

## MMP9 in cancer & computational screening of inhibitors

|                                                 |   |   |   |   |   |   |
|-------------------------------------------------|---|---|---|---|---|---|
| CHEMBL1801052 PubChem-9847113                   | 2 | 4 | 0 | 1 | 1 | 1 |
| CHEMBL234529 PubChem-25181080                   | 3 | 4 | 0 | 0 | 3 | 1 |
| CHEMBL126004 PubChem-10389610                   | 3 | 4 | 0 | 1 | 0 | 1 |
| CHEMBL236167 PubChem-23655323                   | 3 | 3 | 0 | 1 | 0 | 1 |
| CHEMBL429800 PubChem-23656291                   | 3 | 3 | 0 | 1 | 0 | 1 |
| CHEMBL358812 PubChem-10549612                   | 4 | 4 | 0 | 1 | 2 | 0 |
| CHEMBL1801395 PubChem-22707860                  | 2 | 4 | 0 | 1 | 1 | 1 |
| CHEMBL1916211 PubChem-57403331                  | 2 | 2 | 0 | 1 | 0 | 1 |
| CHEMBL1770697 PubChem-20620715                  | 2 | 4 | 0 | 1 | 2 | 1 |
| CHEMBL47728 PubChem-44291532                    | 3 | 3 | 0 | 1 | 0 | 1 |
| CHEMBL303082 PubChem-44306344                   | 2 | 4 | 0 | 1 | 3 | 1 |
| CHEMBL71227 PubChem-44309863                    | 2 | 4 | 0 | 1 | 1 | 1 |
| CHEMBL1770712 PubChem-20620688                  | 3 | 4 | 0 | 1 | 0 | 1 |
| CHEMBL164980 PubChem-11070343                   | 3 | 4 | 0 | 1 | 1 | 0 |
| CHEMBL44045 PubChem-44289352                    | 3 | 3 | 0 | 0 | 0 | 1 |
| CHEMBL362797 PubChem-22644895                   | 3 | 3 | 0 | 1 | 0 | 1 |
| CHEMBL561625 PubChem-45269631                   | 3 | 3 | 0 | 1 | 0 | 1 |
| CHEMBL35606                                     | 3 | 4 | 0 | 1 | 0 | 1 |
| CHEMBL2425935 PubChem-73292710                  | 3 | 4 | 0 | 1 | 1 | 0 |
| CHEMBL2204827 PubChem-71459505                  | 3 | 3 | 0 | 1 | 0 | 1 |
| CHEMBL369302 PubChem-22644965                   | 3 | 4 | 0 | 1 | 0 | 1 |
| CHEMBL1771223 PubChem-54587429                  | 2 | 4 | 0 | 1 | 3 | 1 |
| CHEMBL92778 PubChem-9913479                     | 2 | 4 | 0 | 1 | 1 | 1 |
| CHEMBL292671 PubChem-44299758                   | 3 | 4 | 0 | 1 | 3 | 1 |
| CHEMBL1771216 PubChem-20620240                  | 3 | 4 | 0 | 0 | 3 | 1 |
| CHEMBL1801431 PubChem-10280852 PubChem-46939559 | 2 | 4 | 0 | 1 | 2 | 1 |
| CHEMBL381505 PubChem-44409164                   | 3 | 4 | 0 | 1 | 2 | 1 |
| CHEMBL1771222 PubChem-54580544                  | 2 | 4 | 0 | 1 | 2 | 1 |
| CHEMBL1771215 PubChem-10483139                  | 2 | 4 | 0 | 1 | 3 | 1 |
| CHEMBL1771221 PubChem-54583511                  | 2 | 4 | 0 | 1 | 2 | 1 |
| CHEMBL42771 PubChem-44289604                    | 3 | 3 | 0 | 1 | 0 | 1 |
| CHEMBL1801398 PubChem-46938727                  | 2 | 4 | 0 | 1 | 0 | 1 |
| CHEMBL44250 PubChem-10572544                    | 3 | 3 | 0 | 0 | 0 | 1 |
| CHEMBL338007 PubChem-10789711                   | 4 | 4 | 0 | 1 | 1 | 0 |

Aqueous-solubility level: 0 (extremely low); 1 (very low, but possible); 2 (low); 3 (good). Blood brain barrier level: 0 (Very high penetrant); 1 (High); 2 (Medium); 3 (Low); 4 (Undefined). Cytochrome P450 2D6 level: 0 (Non-inhibitor); 1 (Inhibitor). Hepatotoxicity: 0 (Nontoxic); 1 (Toxic). Human-intestinal absorption level: 0 (good); 1 (moderate); 2 (poor); 3 (very poor). Plasma protein binding: 0 (Absorbent weak); 1 (Absorbent strong).

**Supplementary Table 2.** Toxicities of compounds

|                                | Mouse NTP |       | Rat NTP |       | AMES  | DTP   |
|--------------------------------|-----------|-------|---------|-------|-------|-------|
|                                | Female    | Male  | Female  | Male  |       |       |
| CHEMBL344828 PubChem-10764489  | 0         | 0.68  | 0.809   | 0.383 | 1     | 0.978 |
| CHEMBL2425940 PubChem-73293197 | 0         | 0     | 1       | 1     | 1     | 0     |
| CHEMBL139884 PubChem-10502046  | 0         | 0.016 | 0       | 0.701 | 0.396 | 0.999 |
| CHEMBL381554 PubChem-44409390  | 0         | 0     | 0       | 0     | 0.844 | 1     |
| CHEMBL2425944 PubChem-73293200 | 0         | 0.109 | 1       | 1     | 1     | 0.001 |
| CHEMBL82047 PubChem-10738924   | 0         | 0.964 | 0.439   | 1     | 0.99  | 0.11  |
| CHEMBL196647 PubChem-44402021  | 0.59      | 0     | 1       | 1     | 1     | 1     |
| CHEMBL381163 PubChem-44409365  | 0         | 0     | 0.062   | 0.023 | 0.964 | 1     |
| CHEMBL206481 PubChem-44409389  | 0         | 0     | 0       | 0     | 0.623 | 1     |
| CHEMBL207776 PubChem-21304710  | 0         | 0.003 | 0       | 0.898 | 0.498 | 0.946 |



## MMP9 in cancer & computational screening of inhibitors

|                                                 |       |       |       |       |       |       |
|-------------------------------------------------|-------|-------|-------|-------|-------|-------|
| CHEMBL138643 PubChem-23523890                   | 0     | 1     | 1     | 1     | 1     | 1     |
| CHEMBL382227 PubChem-44411830                   | 0.032 | 0.05  | 1     | 1     | 0     | 1     |
| CHEMBL419503 PubChem-44325156                   | 0     | 0.004 | 1     | 1     | 0.995 | 1     |
| CHEMBL252711 PubChem-44445823                   | 0     | 0     | 1     | 1     | 1     | 1     |
| CHEMBL433171 PubChem-21130561                   | 0.898 | 0.005 | 0.953 | 1     | 1     | 1     |
| CHEMBL1801052 PubChem-9847113                   | 0.076 | 0.352 | 1     | 1     | 0.424 | 1     |
| CHEMBL234529 PubChem-25181080                   | 0.985 | 0.028 | 1     | 0     | 1     | 0.946 |
| CHEMBL126004 PubChem-10389610                   | 0     | 0.891 | 1     | 1     | 0.137 | 0.002 |
| CHEMBL236167 PubChem-23655323                   | 0.003 | 0.012 | 1     | 1     | 1     | 0.434 |
| CHEMBL429800 PubChem-23656291                   | 0.003 | 0.012 | 1     | 1     | 1     | 0.434 |
| CHEMBL358812 PubChem-10549612                   | 0     | 0.006 | 1     | 1     | 0.639 | 0.003 |
| CHEMBL1801395 PubChem-22707860                  | 0     | 0.002 | 0.999 | 1     | 0.948 | 1     |
| CHEMBL1916211 PubChem-57403331                  | 0     | 0     | 0     | 1     | 1     | 0.98  |
| CHEMBL1770697 PubChem-20620715                  | 0.006 | 0.821 | 1     | 1     | 0     | 1     |
| CHEMBL47728 PubChem-44291532                    | 0     | 0     | 0     | 0     | 0.777 | 0     |
| CHEMBL303082 PubChem-44306344                   | 1     | 0.636 | 1     | 1     | 0.999 | 0.521 |
| CHEMBL71227 PubChem-44309863                    | 0     | 0.001 | 0.993 | 1     | 0.983 | 1     |
| CHEMBL1770712 PubChem-20620688                  | 0.018 | 0.998 | 1     | 1     | 0.92  | 1     |
| CHEMBL164980 PubChem-11070343                   | 0     | 1     | 0     | 1     | 1     | 0.273 |
| CHEMBL44045 PubChem-44289352                    | 0     | 0.752 | 0.999 | 0.999 | 0     | 1     |
| CHEMBL362797 PubChem-22644895                   | 0     | 0.001 | 0     | 0     | 0.071 | 0.649 |
| CHEMBL561625 PubChem-45269631                   | 0     | 0.009 | 0.001 | 0.984 | 1     | 0     |
| CHEMBL35606                                     | 0     | 0.002 | 0     | 1     | 0.968 | 0     |
| CHEMBL2425935 PubChem-73292710                  |       |       |       |       |       |       |
| CHEMBL2204827 PubChem-71459505                  | 0.025 | 0.364 | 0.998 | 1     | 1     | 0.829 |
| CHEMBL369302 PubChem-22644965                   | 1     | 0.63  | 1     | 1     | 1     | 0.002 |
| CHEMBL1771223 PubChem-54587429                  | 0     | 0.227 | 1     | 1     | 0.374 | 0     |
| CHEMBL92778 PubChem-9913479                     | 1     | 0.005 | 1     | 1     | 1     | 1     |
| CHEMBL292671 PubChem-44299758                   | 0.987 | 1     | 0.903 | 1     | 1     | 0.002 |
| CHEMBL1771216 PubChem-20620240                  | 0     | 0.997 | 1     | 1     | 0.689 | 0     |
| CHEMBL1801431 PubChem-10280852 PubChem-46939559 | 0     | 0.001 | 0.992 | 1     | 0.588 | 1     |
| CHEMBL381505 PubChem-44409164                   | 0     | 0.17  | 0     | 0.712 | 0.024 | 0.998 |
| CHEMBL1771222 PubChem-54580544                  | 0     | 0.776 | 1     | 1     | 1     | 0.813 |
| CHEMBL1771215 PubChem-10483139                  | 0     | 0.24  | 1     | 1     | 0.334 | 0     |
| CHEMBL1771221 PubChem-54583511                  | 0     | 0.187 | 1     | 1     | 1     | 0.996 |
| CHEMBL42771 PubChem-44289604                    | 0     | 0.875 | 1     | 0.899 | 0.001 | 1     |
| CHEMBL1801398 PubChem-46938727                  | 0     | 0.024 | 0.966 | 1     | 0     | 1     |
| CHEMBL44250 PubChem-10572544                    | 0.001 | 0.611 | 1     | 1     | 0.002 | 1     |
| CHEMBL338007 PubChem-10789711                   | 0     | 0.998 | 1     | 1     | 1     | 1     |

NTP < 0.3 (Non-Carcinogen); > 0.7 (Carcinogen). AMES < 0.3 (Non-Mutagen); > 0.7 (Mutagen). DTP < 0.3 (Nontoxic); > 0.7 (Toxic).

# MMP9 in cancer & computational screening of inhibitors

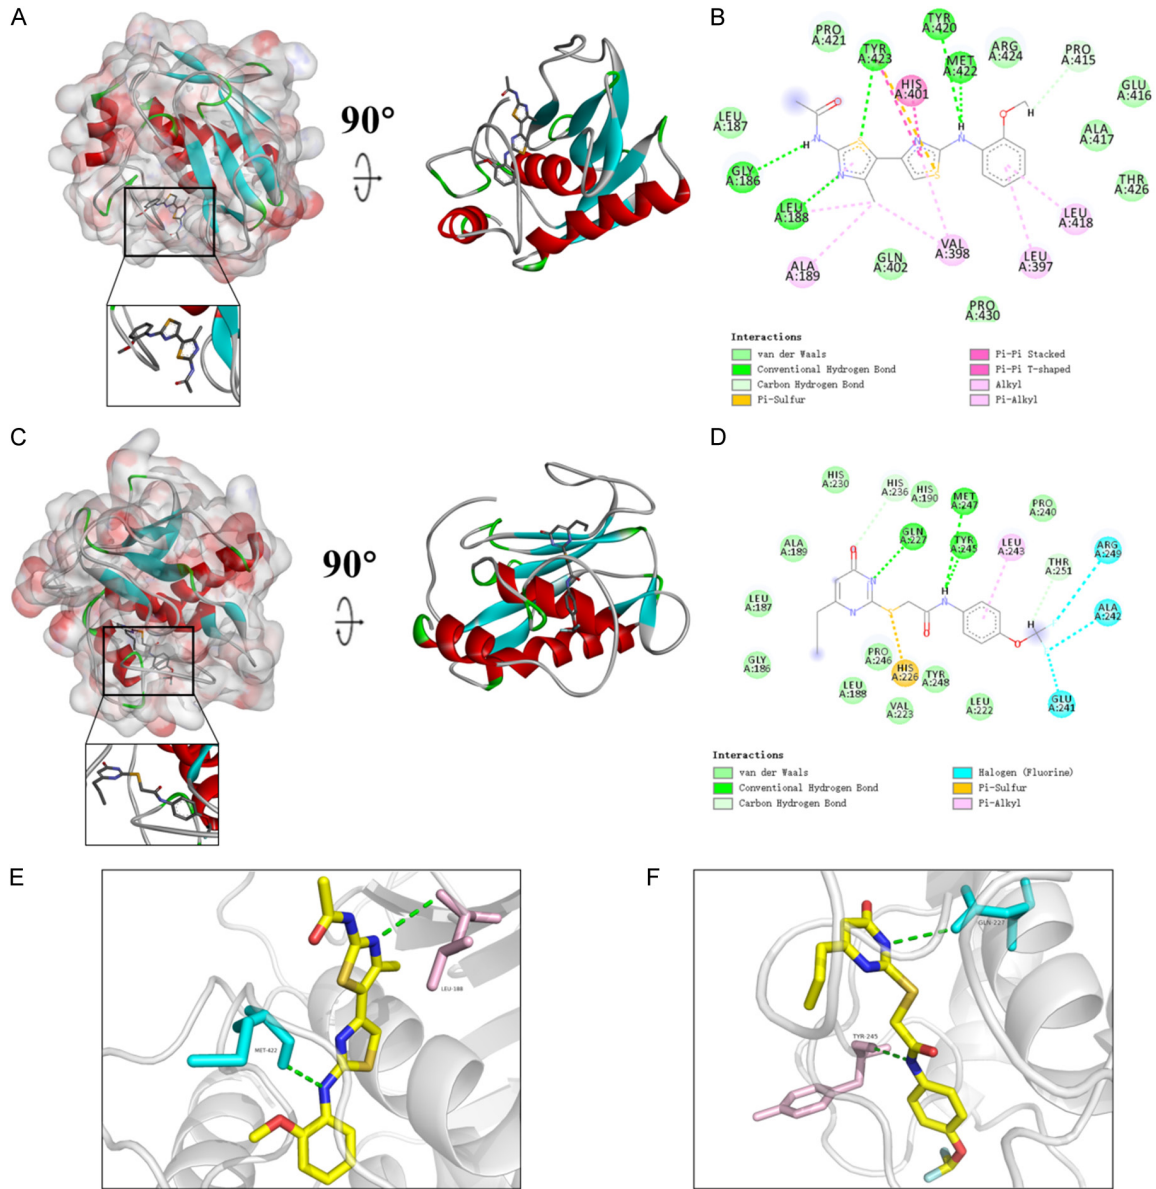

**Supplementary Figure 5.** Schematic drawing of interactions between control drugs and MMP9. (A) JNJ0966-MMP9 complex, (B) JNJ0966 with MMP9, (C) MMP-9-IN-1-MMP9 complex, (D) MMP-9-IN-1 with MMP9. Schematic of intermolecular interaction of the predicted binding modes of (E) JNJ0966 with MMP9, and (F) MMP-9-IN-1 with MMP9.
